# Supplementary material for: Preference and retention of daily and event-driven pre-exposure prophylaxis for HIV prevention: a prospective cohort in Can Tho city, Viet Nam
Source: PubMed Central journal article supplement (PMC10910397; doi:10.1136/bmjopen-2023-075976), 2024-02-29
Supplement: bmjopen-2023-075976supp001.pdf [file bmjopen-2023-075976supp001.pdf]

**Supplementary table 1. Baseline characteristic of participants using daily PrEP by the retention** (excluding participants who decide to discontinue PrEP due to decreased HIV risk perception)

|                                                                                               | All participants (n=491) | Retained in care (n=232) | Lost to follow up (n=259) | P value |
|-----------------------------------------------------------------------------------------------|--------------------------|--------------------------|---------------------------|---------|
| <b>Sex assigned at birth</b>                                                                  |                          |                          |                           |         |
| Male                                                                                          | 465 (94.7%)              | 220 (94.8%)              | 245 (94.6%)               | 0.908   |
| Female                                                                                        | 26 (5.3%)                | 12 (5.2%)                | 14 (5.4%)                 |         |
| <b>Sexual partners</b>                                                                        |                          |                          |                           |         |
| No answer                                                                                     | 1 (0.2%)                 | 1 (0.4%)                 | 0 (0.0%)                  | 0.295   |
| Men exclusively                                                                               | 419 (85.3%)              | 202 (87.1%)              | 217 (83.8%)               |         |
| Men and women                                                                                 | 71 (14.5%)               | 29 (12.5%)               | 42 (16.2%)                |         |
| <b>HIV exposure within the past 3 days</b>                                                    |                          |                          |                           |         |
| No HIV exposure                                                                               | 488 (99.4%)              | 231 (99.6%)              | 257 (99.2%)               | 0.637   |
| HIV exposure                                                                                  | 2 (0.4%)                 | 1 (0.4%)                 | 1 (0.4%)                  |         |
| No answer                                                                                     | 1 (0.2%)                 | 0 (0.0%)                 | 1 (0.4%)                  |         |
| <b>Frequency of sexual activity</b>                                                           |                          |                          |                           |         |
| ≤ 2 times per week                                                                            | 169 (34.4%)              | 107 (46.1%)              | 62 (23.9%)                | <0.001  |
| >2 times per week                                                                             | 264 (53.8%)              | 105 (45.3%)              | 159 (61.4%)               |         |
| No answer                                                                                     | 58 (11.8%)               | 20 (8.6%)                | 38 (14.7%)                |         |
| <b>Having sex without condom with people who were at risk of HIV within the past 6 months</b> |                          |                          |                           |         |
| No                                                                                            | 130 (26.5%)              | 53 (22.8%)               | 77 (29.7%)                | 0.060   |
| Yes                                                                                           | 312 (63.5%)              | 160 (69.0%)              | 152 (58.7%)               |         |
| No answer                                                                                     | 49 (10.0%)               | 19 (8.2%)                | 30 (11.6%)                |         |
| <b>Number of sexual partner within the past 6 months</b>                                      |                          |                          |                           |         |
| 1 sexual partner                                                                              | 115 (23.4%)              | 64 (27.6%)               | 51 (19.7%)                | 0.102   |
| At least 2 sexual partners                                                                    | 370 (75.4%)              | 166 (71.6%)              | 204 (78.8%)               |         |
| No answer                                                                                     | 6 (1.2%)                 | 2 (0.9%)                 | 4 (1.5%)                  |         |
| <b>Having sex for money or gifts within the past 6 months</b>                                 |                          |                          |                           |         |
| No                                                                                            | 461 (93.9%)              | 225 (97.0%)              | 236 (91.1%)               | 0.017   |
| Yes                                                                                           | 21 (4.3%)                | 6 (2.6%)                 | 15 (5.8%)                 |         |
| No answer                                                                                     | 9 (1.8%)                 | 1 (0.4%)                 | 8 (3.1%)                  |         |
| <b>Diagnosis and/or treatment with an STI within the past 6 months</b>                        |                          |                          |                           |         |
| No                                                                                            | 439 (89.4%)              | 208 (89.7%)              | 231 (89.2%)               | 0.006   |
| Yes                                                                                           | 39 (7.9%)                | 23 (9.9%)                | 16 (6.2%)                 |         |
| No answer                                                                                     | 13 (2.6%)                | 1 (0.4%)                 | 12 (4.6%)                 |         |
| <b>Sharing needles with other people within the past 6 months</b>                             |                          |                          |                           |         |
| No                                                                                            | 486 (99.8%)              | 230 (100.0%)             | 256 (99.6%)               | 0.344   |

|                                           |             |             |             |         |
|-------------------------------------------|-------------|-------------|-------------|---------|
| Yes                                       | 0 (0.0%)    | 0 (0.0%)    | 0 (0.0%)    |         |
| No answer                                 | 1 (0.2%)    | 0 (0.0%)    | 1 (0.4%)    |         |
| <b>Used PrEP within the past 6 months</b> |             |             |             |         |
| No                                        | 451 (92.6%) | 199 (86.5%) | 252 (98.1%) | <0.0001 |
| Yes                                       | 33 (6.8%)   | 31 (13.5%)  | 2 (0.8%)    |         |
| No answer                                 | 3 (0.6%)    | 0 (0.0%)    | 3 (1.2%)    |         |
| <b>Willingness to pay for PrEP</b>        |             |             |             |         |
| < \$4.25/month                            | 100 (20.4%) | 44 (19.0%)  | 56 (21.6%)  | 0.101   |
| \$4.25-\$14.89/month                      | 302 (61.5%) | 138 (59.5%) | 164 (63.3%) |         |
| \$14.89-42.55\$/month                     | 67 (13.6%)  | 41 (17.7%)  | 26 (10.0%)  |         |
| >\$42.55/month                            | 1 (0.2%)    | 1 (0.4%)    | 0 (0.0%)    |         |
| Don't want/unable to pay for PrEP         | 21 (4.3%)   | 8 (3.4%)    | 13 (5.0%)   |         |

**Supplementary table 3. Concerns about potential barriers to access PrEP at baseline**

|                                                                          | All         | Daily PrEP  | ED-PrEP    |
|--------------------------------------------------------------------------|-------------|-------------|------------|
| Anticipated barrier to PrEP                                              | 338 (36.5%) | 265 (39.4%) | 73 (28.9%) |
| Concern about side effects                                               | 9 (1.0%)    | 9 (1.3%)    | 0 (0.0%)   |
| Difficult in managing the time for visiting clinic and drug pick up PrEP | 8 (0.9%)    | 5 (0.7%)    | 3 (1.2%)   |
| Concerned about stigma/community perception                              | 8 (0.9%)    | 8 (1.2%)    | 0 (0.0%)   |
| Concerned about family finding out                                       | 6 (0.6%)    | 6 (0.9%)    | 0 (0.0%)   |
| Concern about cost                                                       | 6 (0.6%)    | 6 (0.9%)    | 0 (0.0%)   |
| Concerned about stigma/community perception                              | 4 (0.4%)    | 4 (0.6%)    | 0 (0.0%)   |
| Difficulty in planning sex in advance                                    | 3 (0.3%)    | 1 (0.1%)    | 2 (0.8%)   |
| Concerned about carrying the pills                                       | 2 (0.2%)    | 2 (0.3%)    | 0 (0.0%)   |
| Difficulty in taking the pills 2 hours before sex                        | 1 (0.1%)    | 1 (0.1%)    | 0 (0.0%)   |
| Difficulty in remembering to take tablet everyday                        | 1 (0.1%)    | 0 (0.0%)    | 1 (0.4%)   |
| Drug storage                                                             | 1 (0.1%)    | 1 (0.1%)    | 0 (0.0%)   |
| Difficulty in managing the time for visiting clinic and drug pick up     | 1 (0.1%)    | 0 (0.0%)    | 1 (0.4%)   |
| Concerned on the comorbidity of asthma                                   | 1 (0.1%)    | 0 (0.0%)    | 1 (0.4%)   |
| Difficulty in transportation of PrEP                                     | 0 (0.0%)    | 0 (0.0%)    | 0 (0.0%)   |
| Concerned about partner finding out                                      | 0 (0.0%)    | 0 (0.0%)    | 0 (0.0%)   |
| Difficulty in remembering to take the following doses                    | 0 (0.0%)    | 0 (0.0%)    | 0 (0.0%)   |
| Difficulty in accessing STI, hepatitis testing and/or treatment          | 0 (0.0%)    | 0 (0.0%)    | 0 (0.0%)   |

**Supplementary table 3. Challenges reported by daily PrEP users at 3, 6 and 12 months interviews**

|                                   | 3 months<br>N= 373 | 6 months<br>N=235 | 12 months<br>N=44 |
|-----------------------------------|--------------------|-------------------|-------------------|
| Willing to pay for PrEP per month |                    |                   |                   |

|                                                                     |             |             |            |
|---------------------------------------------------------------------|-------------|-------------|------------|
| Don't want/unable to pay for PrEP                                   | 19 (5.1%)   | 9 (3.8%)    | 0 (0.0%)   |
| >\$42.55                                                            | 1 (0.3%)    | 1 (0.4%)    | 0 (0.0%)   |
| \$14.89-42.55\$                                                     | 45 (12.1%)  | 36 (15.3%)  | 21 (47.7%) |
| \$4.25-\$14.89                                                      | 240 (64.3%) | 152 (64.7%) | 22 (50.0%) |
| < \$4.25                                                            | 68 (18.2%)  | 36 (15.3%)  | 1 (2.3%)   |
| <b>In the past 3 months, do you use daily PrEP or ED PrEP?</b>      |             |             |            |
| Both daily and ED PrEP                                              | 17 (4.6%)   | 3 (1.3%)    | 0 (0.0%)   |
| Daily PrEP                                                          | 296 (79.4%) | 190 (80.9%) | 36 (81.8%) |
| Any difficulties in taking PrEP medication in the past 3 months     | 110 (29.5%) | 22 (9.4%)   | 13 (29.5%) |
| Forgot to take one or more PrEP doses                               | 37 (9.9%)   | 9 (3.8%)    | 5 (11.4%)  |
| Fitting PrEP into daily routine (for daily PrEP users)              | 7 (1.9%)    | 1 (0.4%)    | 1 (2.3%)   |
| Unsure when to take PrEP medications                                | 1 (0.3%)    | 1 (0.4%)    | 0 (0.0%)   |
| Didn't know what to do about a missed dose                          | 5 (1.3%)    | 3 (1.3%)    | 2 (4.5%)   |
| Concerns about interactions with other medications                  | 11 (2.9%)   | 5 (2.1%)    | 7 (15.9%)  |
| Concerns about interactions with alcohol                            | 2 (0.5%)    | 3 (1.3%)    | 2 (4.5%)   |
| Concerns about interactions with hormonal therapy                   | 1 (0.3%)    | 1 (0.4%)    | 0 (0.0%)   |
| Have you had any difficulties accessing PrEP services?              | 131 (35.1%) | 53 (22.6%)  | 18 (40.9%) |
| Difficult in managing the time for visiting clinic and drug pick up | 37 (9.9%)   | 18 (7.7%)   | 6 (13.6%)  |
| Transportation difficulty                                           | 11 (2.9%)   | 13 (5.5%)   | 13 (29.5%) |
| Concerned about partner finding out                                 | 5 (1.3%)    | 5 (2.1%)    | 1 (2.3%)   |
| Concerned about family finding out                                  | 32 (8.6%)   | 12 (5.1%)   | 2 (4.5%)   |
| Concerned about stigma/community perception                         | 9 (2.4%)    | 5 (2.1%)    | 0 (0.0%)   |
| Difficulty in remembering to take tablet everyday                   | 17 (4.6%)   | 2 (0.9%)    | 0 (0.0%)   |
| Carrying the pills with me                                          | 13 (3.5%)   | 7 (3.0%)    | 5 (11.4%)  |
| Concern about side effects                                          | 52 (13.9%)  | 12 (5.1%)   | 4 (9.1%)   |
| Concern about cost                                                  | 9 (2.4%)    | 1 (0.4%)    | 0 (0.0%)   |
| Difficulty in accessing STI, Hepatitis testing and/or treatment     | 5 (1.3%)    | 3 (1.3%)    | 1 (2.3%)   |
| Health services closed due to Covid-19                              | 33 (8.8%)   | 21 (8.9%)   | 16 (36.4%) |

|                                                 |           |            |            |
|-------------------------------------------------|-----------|------------|------------|
| Not able to leave home due to Covid-19 lockdown | 34 (9.1%) | 27 (11.5%) | 15 (34.1%) |
| <b>Side effects</b>                             |           |            |            |
| Sleepy                                          | 1 (0.3%)  | 0 (0.0%)   | 0 (0.0%)   |
| Nausea                                          | 12 (3.2%) | 1 (0.4%)   | 1 (2.3%)   |
| Muscle pain                                     | 1 (0.3%)  | 0 (0.0%)   | 0 (0.0%)   |
| Loss of appetite                                | 2 (0.5%)  | 0 (0.0%)   | 0 (0.0%)   |
| Headache                                        | 3 (0.8%)  | 3 (1.3%)   | 2 (4.5%)   |
| Dry lips                                        | 5 (1.3%)  | 2 (0.9%)   | 1 (2.3%)   |
| Burning                                         | 5 (1.3%)  | 2 (0.9%)   | 4 (9.1%)   |
| Acne                                            | 0 (0.0%)  | 0 (0.0%)   | 2 (4.5%)   |
| Hyperpigmentation                               | 0 (0.0%)  | 0 (0.0%)   | 0 (0.0%)   |
| Fatigue                                         | 7 (1.9%)  | 6 (2.5%)   | 1 (2.3%)   |
| Dizziness                                       | 7 (1.9%)  | 0 (0.0%)   | 0 (0.0%)   |
| Dry skin                                        | 0 (0.0%)  | 0 (0.0%)   | 1 (2.3%)   |

**Supplementary table 4. Number of participants switching between daily and ED-PrEP during the following up period**

|                                                  | Regimen                             | Participants preferred a daily PrEP regimen |        |
|--------------------------------------------------|-------------------------------------|---------------------------------------------|--------|
| <b>During the first 3 months of PrEP use</b>     | Daily PrEP                          | 296                                         | 80.0%  |
|                                                  | ED-PrEP                             | 57                                          | 15.4%  |
|                                                  | Switching between daily and ED-PrEP | 17                                          | 4.6%   |
|                                                  | Subtotal                            | 370                                         | 100.0% |
| <b>Between 3 months and 6 months of PrEP use</b> | Daily PrEP                          | 190                                         | 81.2%  |
|                                                  | ED-PrEP                             | 41                                          | 17.5%  |

|                                            |                                     |     |        |
|--------------------------------------------|-------------------------------------|-----|--------|
|                                            | Switching between daily and ED-PrEP | 3   | 1.3%   |
|                                            | Subtotal                            | 234 | 100.0% |
| <b>Between 9 and 12 months of PrEP use</b> | Daily PrEP                          | 36  | 83.7%  |
|                                            | ED-PrEP                             | 7   | 16.3%  |
|                                            | Switching between daily and ED-PrEP | 0   | 0.0%   |
|                                            | Subtotal                            | 43  | 100.0% |
